# Supplementary material for: Convergences and divergences between scientific and Indigenous and Local Knowledge contribute to inform carnivore conservation
Source: PubMed Central journal article supplement (PMC8035381; doi:10.1007/s13280-020-01443-4), 2021-01-13
Supplement: 13280_2020_1443_MOESM1_ESM.pdf [file 13280_2020_1443_MOESM1_ESM.pdf]

## **Ambio**

### *Electronic Supplementary Material*

*This supplementary material has not been peer reviewed.*

**Title: Convergences and divergences between scientific and Indigenous and Local Knowledge contribute to inform carnivore conservation**

**Authors:** Miquel Torrents-Ticó, Álvaro Fernández-Llamazares, Daniel Burgas, Mar Cabeza.

This file includes:

**Table S1.** Questionnaires used in the semi- structured interviews.

**Table S2.** Track rates from various study areas across African landscapes.

**Table S3.** Photographic rates from various study areas across African landscapes.

**Table S1.** Questionnaires used in the semi- structured interviews.

**Village/Area of origin:**

| <b>Coderid:</b> | <b>Closest village:</b>                                                                                                                    |                          |                    | <b>Date:</b>                                                                                                                                                           | <b>Estimated age:</b>                                                  |                  | <b>Sex: M or F</b> |
|-----------------|--------------------------------------------------------------------------------------------------------------------------------------------|--------------------------|--------------------|------------------------------------------------------------------------------------------------------------------------------------------------------------------------|------------------------------------------------------------------------|------------------|--------------------|
|                 | When you were a child, was this animal common/present/absent in Sibiloï?<br><br>Is this animal currently common/present/absent in Sibiloï? |                          |                    | Why do you think that this animal is now more or less abundant?                                                                                                        | When and where was the last time that you remember seeing this animal? |                  | Notes              |
|                 | 2=common (many individuals seen often); 1=present in low numbers (some seen occasionally); 0=absent (not seen)                             |                          |                    | Text                                                                                                                                                                   | When?<br>(text)                                                        | Where?<br>(text) |                    |
| <b>Animal</b>   | Past*<br>(>20 yrs)                                                                                                                         | Recent*<br>(past 20 yrs) | Now<br>(past year) | *For individuals visibly older than 30 years old, fill the first and last column<br>For individuals visibly younger than 30 years old, fill the second and last column |                                                                        |                  |                    |
| Lion            |                                                                                                                                            |                          |                    |                                                                                                                                                                        |                                                                        |                  |                    |
| Leopard         |                                                                                                                                            |                          |                    |                                                                                                                                                                        |                                                                        |                  |                    |
| Cheetah         |                                                                                                                                            |                          |                    |                                                                                                                                                                        |                                                                        |                  |                    |
| Caracal         |                                                                                                                                            |                          |                    |                                                                                                                                                                        |                                                                        |                  |                    |
| Stripped hyena  |                                                                                                                                            |                          |                    |                                                                                                                                                                        |                                                                        |                  |                    |
| Spotted hyena   |                                                                                                                                            |                          |                    |                                                                                                                                                                        |                                                                        |                  |                    |
| Jackal          |                                                                                                                                            |                          |                    |                                                                                                                                                                        |                                                                        |                  |                    |

**Table S2.** Track rates from various study areas across African landscapes.

|                       | <b>Tsavo National Park,<br/>(Kenya)<br/>Henschel et al. 2020</b> | <b>Meibae Community<br/>Conservancy (Kenya)<br/>Masseloux et al. 2018</b> | <b>Shayamanzi Game<br/>Ranch (South Africa)<br/>Gusset and Burgener 2005</b> |
|-----------------------|------------------------------------------------------------------|---------------------------------------------------------------------------|------------------------------------------------------------------------------|
| <b>Caracal</b>        | -                                                                | 0.0025                                                                    | 0.1                                                                          |
| <b>Cheetah</b>        | 0.04                                                             | 0.0025                                                                    | -                                                                            |
| <b>Jackal</b>         | -                                                                | 0.07                                                                      | 0.73                                                                         |
| <b>Leopard</b>        | 0.13                                                             | 0.01                                                                      | 0.03                                                                         |
| <b>Lion</b>           | 0.22                                                             | -                                                                         | -                                                                            |
| <b>Spotted hyaena</b> | 0.83                                                             | 0.14                                                                      | -                                                                            |
| <b>Striped hyaena</b> | 0.17                                                             | 0.002                                                                     | -                                                                            |

The results from the studies have been transformed to be comparable to our measure based on their method descriptions. The results on relative numbers are still sensible, with the disclaimer that the area is different ecosystems and slightly different transect methodologies.

## References

- Gusset, M., and N. Burgener. 2005. Estimating larger carnivore numbers from track counts and measurements. *African Journal of Ecology* 43: 320-324.
- Henschel, P., L.S. Petracca, S.M. Ferreira, S. Ekwanga, S.D. Ryan, and L.G. Frank. 2020. Census and distribution of large carnivores in the Tsavo national parks, a critical east African wildlife corridor. *African Journal of Ecology* 58: 383-398.
- Masseloux, J., C.W. Epps, A. Duarte, D. Schwalm, and M. Wykstra. 2018. Using detection/non-detection surveys and interviews to assess carnivore site use in Kenya. *African Journal of Wildlife Research* 48.

**Table S3.** Photographic rates from various study areas across African landscapes.

|                | Rift Valley (Kenya)<br>Schuette et al. 2013 | Ngamiland District (Botswana)<br>Rich et al. 2016 | Lake Manyara National Park (Tanzania)<br>Steinbeiser et al. 2019 |
|----------------|---------------------------------------------|---------------------------------------------------|------------------------------------------------------------------|
| Caracal        | 0.0009                                      | 0.014                                             | -                                                                |
| Cheetah        | 0.0008                                      | 0.00045                                           | -                                                                |
| Jackal         | 0.005                                       | 0.04                                              | 0.019                                                            |
| Leopard        | 0.00072                                     | 0.05                                              | 0.012                                                            |
| Lion           | 0.0035                                      | 0.012                                             | 0.012                                                            |
| Spotted hyaena | 0.012                                       | 0.097                                             | 0.079                                                            |
| Striped hyaena | 0.015                                       | -                                                 |                                                                  |

The results from the studies have been transformed to be comparable to our measure based on their method descriptions. The results on relative numbers are still sensible, with the disclaimer that the area is different ecosystems and slightly different methodologies.

## References

- Rich, L.N., D.A. Miller, H.S. Robinson, J.W. McNutt, and M.J. Kelly. 2016. Using camera trapping and hierarchical occupancy modelling to evaluate the spatial ecology of an African mammal community. *Journal of Applied Ecology* 53: 1225-1235.
- Schuette, P., A.P. Wagner, M.E. Wagner, and S. Creel. 2013. Occupancy patterns and niche partitioning within a diverse carnivore community exposed to anthropogenic pressures. *Biological Conservation* 158: 301-312.
- Steinbeiser, C.M., J. Kioko, A. Maresi, R. Kaitilia, and C. Kiffner. 2019. Relative abundance and activity patterns explain method-related differences in mammalian species richness estimates. *Journal of Mammalogy* 100: 192-201.
